# Supplementary material
Source: MDPI journal article supplement (https://www.mdpi.com/1999-4907/12/5/536)
Supplement: s1 [file s1]

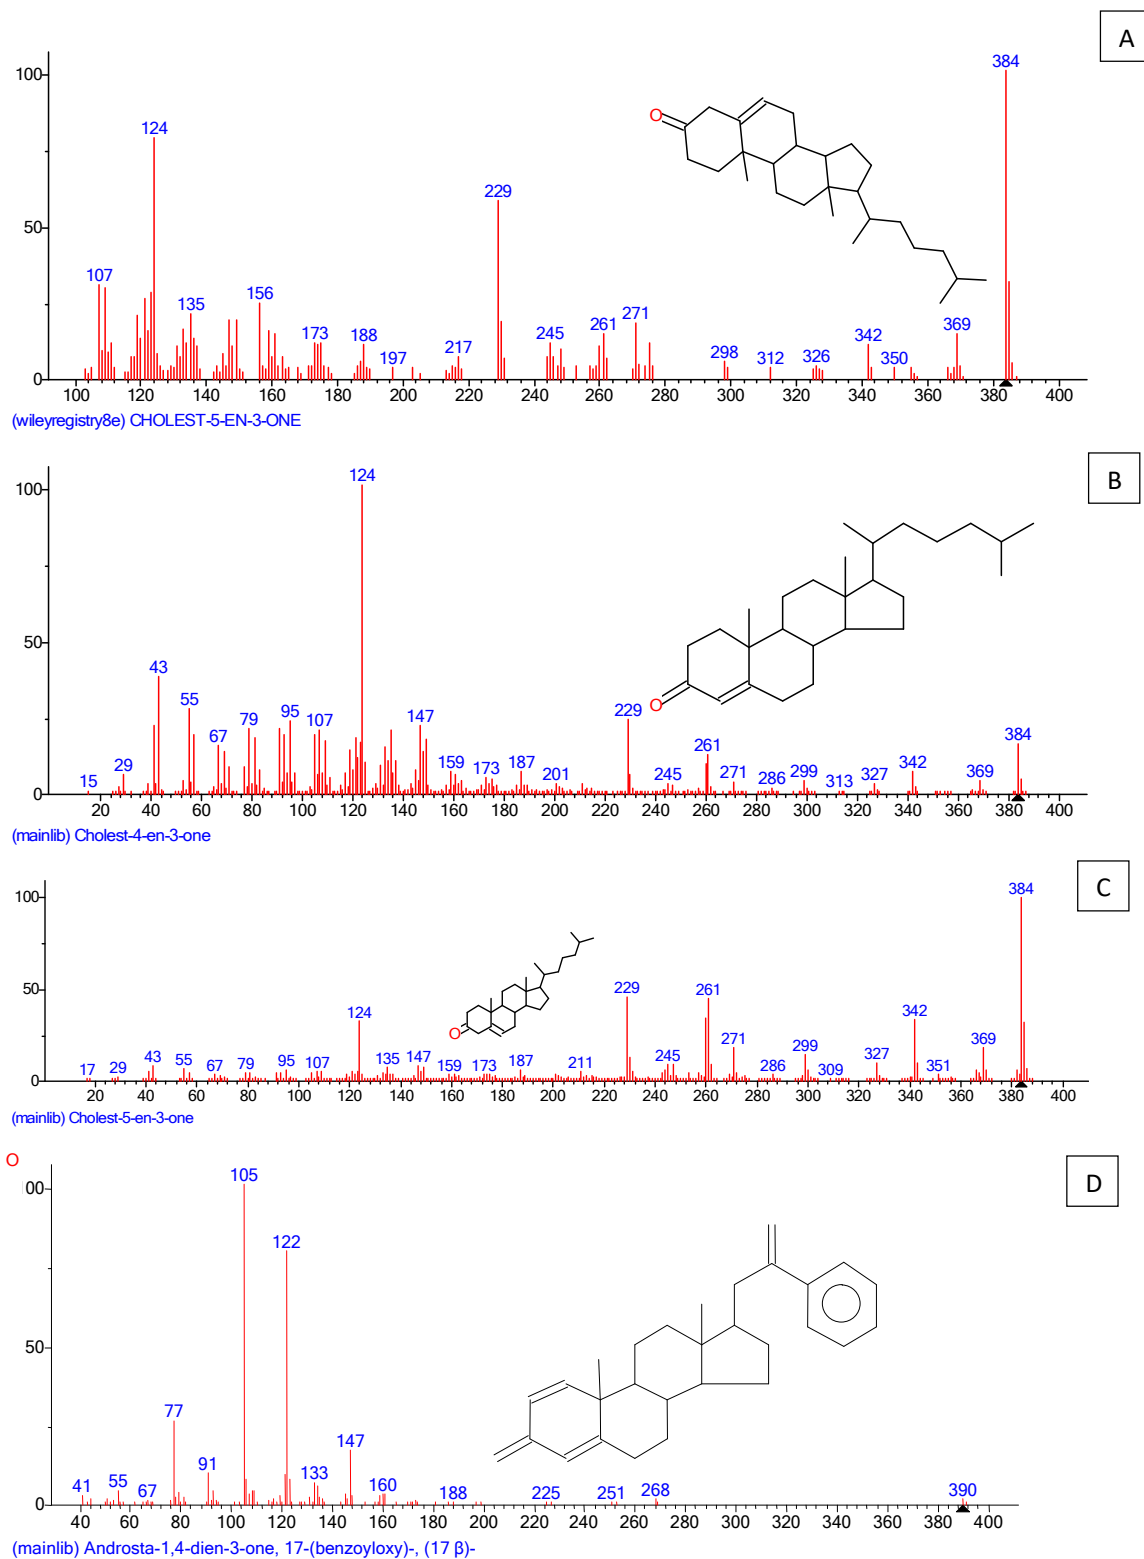

Figure S1. Spectra of potential steroid hormones (A- cholestenone, B- 4,6-cholestadien-3-on, C- cholest-4-en-3,6-dien-3-one, D- 17 $\beta$ -Hydroxyandrosta-1,4-dien-3-one benzoate) isolated from adult bodies of *I. typographus* and *P. chalcographus*.
